# Supplementary material for: Effect of 10-valent pneumococcal conjugate vaccine on the incidence of radiologically-confirmed pneumonia and clinically-defined pneumonia in Kenyan children: an interrupted time-series analysis
Source: PubMed Central journal article supplement (PMC6379823; doi:10.1016/s2214-109x(18)30491-1), 2019-02-14
Supplement: mmc1.pdf [file mmc1.pdf]

# THE LANCET

## Global Health

### Supplementary appendix

This appendix formed part of the original submission and has been peer reviewed. We post it as supplied by the authors.

Supplement to: Silaba M, Ooko M, Bottomley C, et al. Effect of 10-valent pneumococcal conjugate vaccine on the incidence of radiologically-confirmed pneumonia and clinically-defined pneumonia in Kenyan children: an interrupted time-series analysis. *Lancet Glob Health* 2019; **7**: e337–46.

## Supplementary Tables

**The effect of 10-valent Pneumococcal Conjugate Vaccine on the incidence of radiologically-confirmed pneumonia and clinically-defined pneumonia in Kenyan children: an interrupted time-series analysis.**

Micah Silaba, Michael Ooko, Christian Bottomley, Joyce Sande, Rachel Benamore, Kate Park, James Ignas, Kathryn Maitland, Neema Mturi, Anne Makumi, Mark Otiende, Stanley Kagwanja, Sylvester Safari, Victor Ochola, Tahreni Bwanaali, Evasius Bauni, Fergus Gleeson, Maria Deloria Knoll, Ifedayo Adetifa, Kevin Marsh, Thomas N Williams, Tatu Kamau, Shahnaaz Sharif, Orin S Levine, Laura L Hammitt, J Anthony G Scott

### **Contents**

Page 2: Suppl. Table 1

Page 3: Suppl. Table 1

Page 4: Suppl. Table 1

**Suppl. Table 1. Incidence rate ratios for season, time and PCV10 introduction against hospitalisation with radiologically-confirmed pneumonia, with severe or very severe clinically-defined pneumonia, and with diarrhoea among children aged 2-59 months.**

| Variable           | Radiologically-confirmed pneumonia |              | Severe or very severe clinically-defined pneumonia |              | Diarrhoea            |              |
|--------------------|------------------------------------|--------------|----------------------------------------------------|--------------|----------------------|--------------|
|                    | Incidence Rate Ratio               | 95% CI       | Incidence Rate Ratio                               | 95% CI       | Incidence Rate Ratio | 95% CI       |
| PCV10 introduction | 0.52                               | 0.32, 0.86   | 0.73                                               | 0.54, 0.97   | 0.63                 | 0.31, 1.26   |
| Time (in months)   | 0.999                              | 0.990, 1.007 | 0.995                                              | 0.991, 0.998 | 0.992                | 0.985, 0.999 |
| Seasonal month     |                                    |              |                                                    |              |                      |              |
| January            | Ref                                |              | Ref                                                |              | Ref                  |              |
| February           | 0.83                               | 0.47, 1.46   | 0.88                                               | 0.74, 1.05   | 0.94                 | 0.71, 1.24   |
| March              | 0.85                               | 0.47, 1.56   | 0.73                                               | 0.58, 0.93   | 1.08                 | 0.80, 1.46   |
| April              | 0.54                               | 0.32, 0.92   | 0.61                                               | 0.48, 0.77   | 1.34                 | 0.88, 2.06   |
| May                | 0.51                               | 0.27, 0.94   | 0.57                                               | 0.44, 0.73   | 1.97                 | 1.29, 2.99   |
| June               | 0.48                               | 0.25, 0.93   | 0.59                                               | 0.46, 0.76   | 2.18                 | 1.46, 3.26   |
| July               | 0.67                               | 0.33, 1.33   | 0.73                                               | 0.58, 0.93   | 2.24                 | 1.48, 3.38   |
| August             | 0.77                               | 0.42, 1.39   | 0.73                                               | 0.57, 0.94   | 1.52                 | 0.92, 2.49   |
| September          | 0.69                               | 0.37, 1.31   | 0.65                                               | 0.50, 0.84   | 1.06                 | 0.67, 1.66   |
| October            | 0.74                               | 0.40, 1.37   | 0.74                                               | 0.55, 0.99   | 0.94                 | 0.62, 1.42   |
| November           | 0.96                               | 0.57, 1.62   | 0.94                                               | 0.75, 1.18   | 1.01                 | 0.73, 1.40   |
| December           | 0.87                               | 0.50, 1.50   | 1.09                                               | 0.91, 1.29   | 1.08                 | 0.78, 1.51   |

CI, confidence interval

**Suppl. Table 2. Correlation between annual admission counts of clinically-defined pneumonia and discharge diagnoses of other diseases in the pre-vaccine era (2002-2010)**

| <b>Diagnosis*</b>           | <b>Number</b> | <b>Correlation</b> | <b>95% CI</b> | <b>P-value</b> |
|-----------------------------|---------------|--------------------|---------------|----------------|
| <b><i>At discharge</i></b>  |               |                    |               |                |
| Unclassified                | 274           | 0.85               | 0.42, 0.97    | 0.004          |
| Gastroenteritis             | 2,146         | 0.81               | 0.32, 0.96    | 0.008          |
| Encephalopathy              | 66            | 0.80               | 0.28, 0.96    | 0.010          |
| Trauma                      | 177           | 0.74               | 0.15, 0.94    | 0.023          |
| Malnutrition                | 767           | 0.67               | 0.02, 0.92    | 0.046          |
| Febrile convulsions         | 521           | 0.56               | -0.16, 0.89   | 0.11           |
| Meningitis                  | 67            | 0.52               | -0.22, 0.88   | 0.15           |
| Malaria                     | 2,308         | 0.48               | -0.27, 0.87   | 0.19           |
| Sepsis                      | 89            | 0.45               | -0.31, 0.86   | 0.23           |
| All other conditions        | 632           | 0.40               | -0.36, 0.84   | 0.28           |
| Burns                       | 369           | 0.35               | -0.41, 0.82   | 0.36           |
| Anaemia                     | 399           | 0.32               | -0.44, 0.81   | 0.41           |
| Cellulitis                  | 280           | 0.22               | -0.52, 0.77   | 0.57           |
| Kerosene poisoning          | 97            | 0.20               | -0.53, 0.76   | 0.60           |
| Upper Respiratory Infection | 322           | 0.16               | -0.56, 0.75   | 0.68           |
| Epilepsy                    | 121           | 0.08               | -0.62, 0.71   | 0.84           |
| Sickle cell disease         | 243           | 0.02               | -0.65, 0.68   | 0.95           |
| Elective surgery            | 132           | -0.11              | -0.72, 0.60   | 0.79           |
| <b><i>On admission</i></b>  |               |                    |               |                |
| Diarrhoea                   | 3,010         | 0.89               | 0.57, 0.98    | 0.001          |

CI confidence interval

\* Between 2002-2010 there were 28,000 paediatric admissions in the age group 2-59 months; 16,245 (58%) were residents of the KHDSS. Of these 6,346 had a clinical diagnosis of severe or very severe pneumonia. Of the remaining 9,899 children, 643 had a primary discharge diagnosis of lower respiratory tract infection (LRTI) and 272 had a secondary discharge diagnosis of LRTI; the discharge diagnoses of 70 children were missing. All of these were excluded from the analysis leaving 8,914 children with non-pneumonia diagnoses. As gastroenteritis was the classified category with the highest correlation, we also examined the correlation between admission with diarrhoea (but without severe or very severe pneumonia) and admission with pneumonia which is given in the last row of the table.

**Suppl. Table 3. Incidence rate ratios for the effects of PCV10 introduction against hospitalisation with WHO-defined severe or very severe pneumonia among children aged 2-143 months, in sub-groups of age and clinical severity, and with diarrhoea and all other admissions.**

| <b>End-point and sub-groups</b>        | <b>PCV10 Incidence Rate Ratio</b> | <b>95% CI</b> | <b>P value</b> |
|----------------------------------------|-----------------------------------|---------------|----------------|
| <u>Severe pneumonia</u>                |                                   |               |                |
| 2-59 months                            | 0.60                              | 0.40, 0.91    | 0.017          |
| <u>Very severe pneumonia</u>           |                                   |               |                |
| 2-59 months                            | 0.87                              | 0.56, 1.34    | 0.519          |
| <u>Severe or very severe pneumonia</u> |                                   |               |                |
| 2-59 months                            | 0.73                              | 0.54, 0.97    | 0.033          |
| 2-11 months                            | 0.70                              | 0.50, 1.00    | 0.048          |
| 12-23 months                           | 0.84                              | 0.61, 1.15    | 0.283          |
| 24-59 months                           | 0.71                              | 0.43, 1.19    | 0.192          |
| 60-143 months                          | 0.95                              | 0.56, 1.59    | 0.832          |
| <u>Diarrhoea</u>                       |                                   |               |                |
| 2-59 months                            | 0.63                              | 0.31, 1.26    | 0.190          |
| 2-11 months                            | 0.79                              | 0.42, 1.48    | 0.459          |
| 12-23 months                           | 0.63                              | 0.41, 0.99    | 0.044          |
| 24-59 months                           | 0.62                              | 0.39, 0.99    | 0.046          |
| 60-143 months                          | 0.66                              | 0.46, 0.95    | 0.027          |
| <u>All other admissions</u>            |                                   |               |                |
| 2-59 months                            | 0.89                              | 0.57, 1.39    | 0.614          |

CI, confidence interval

The analyses of severe and very severe pneumonia have been presented previously in Table 3. They are reproduced here to compare with the incidence rate ratios in the control condition (diarrhoea).
